# Supplementary material
Source: PubMed Central journal article supplement (PMC4399006)
Supplement: NIHMS670948-supplement-1.pdf [file NIHMS670948-supplement-1.pdf]

## Supplementary Information

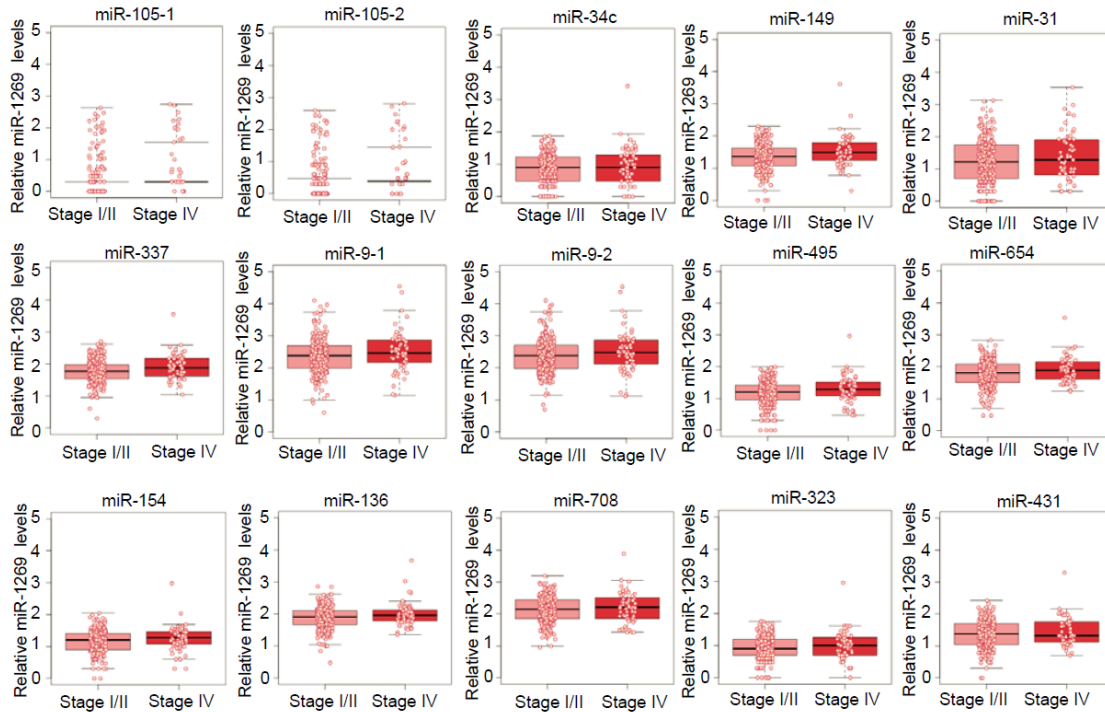

**Supplementary Figure 1. microRNAs upregulated in late-stage CRCs according to TCGA.** Expression levels of microRNAs from Table S1 in individual early- (stage I/II, n=230) and late-stage (stage IV, n=59) CRCs according to miRNASeq data from COAD.

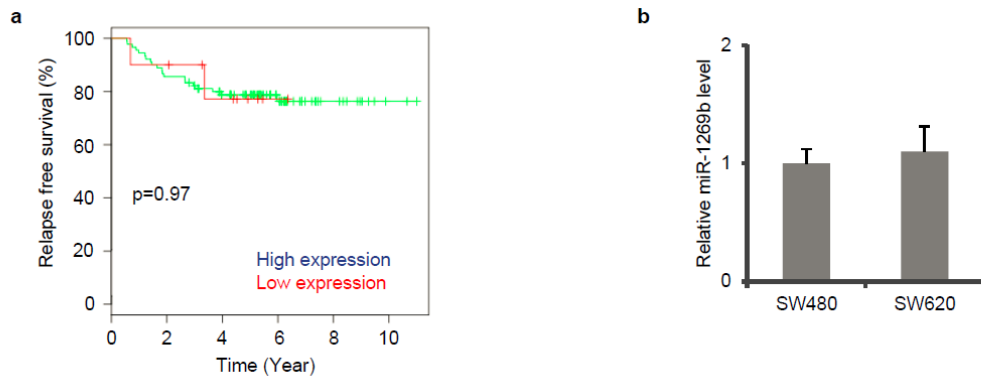

**Supplementary Figure 2. miR-1269b is not associated with relapse.**

(a) Kaplan-Meier analysis of relapses of Stage II CRC patients with high (red, n=10) and low (blue, n=90) miR-1269b levels in their surgically removed primary tumors. The p-value was calculated based on logrank test. (b) RT-qPCR of miR-1269b levels in SW480 and SW620 cells. Error bars denote s.d. of triplicates.

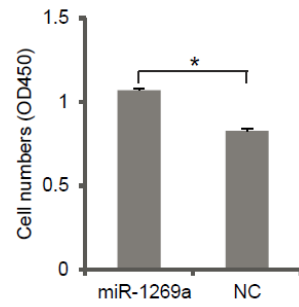

**Supplementary Figure 3. The effect of miR-1269 on cell growth *in vitro*.**

SWT-1 assay measuring the growth of SW480 cells with a control (NC) or a miR-1269a expression (miR-1269a) vector. Error bars denote the s.d. between triplicates. \*,  $p < 0.05$ , Student's *t*-test.

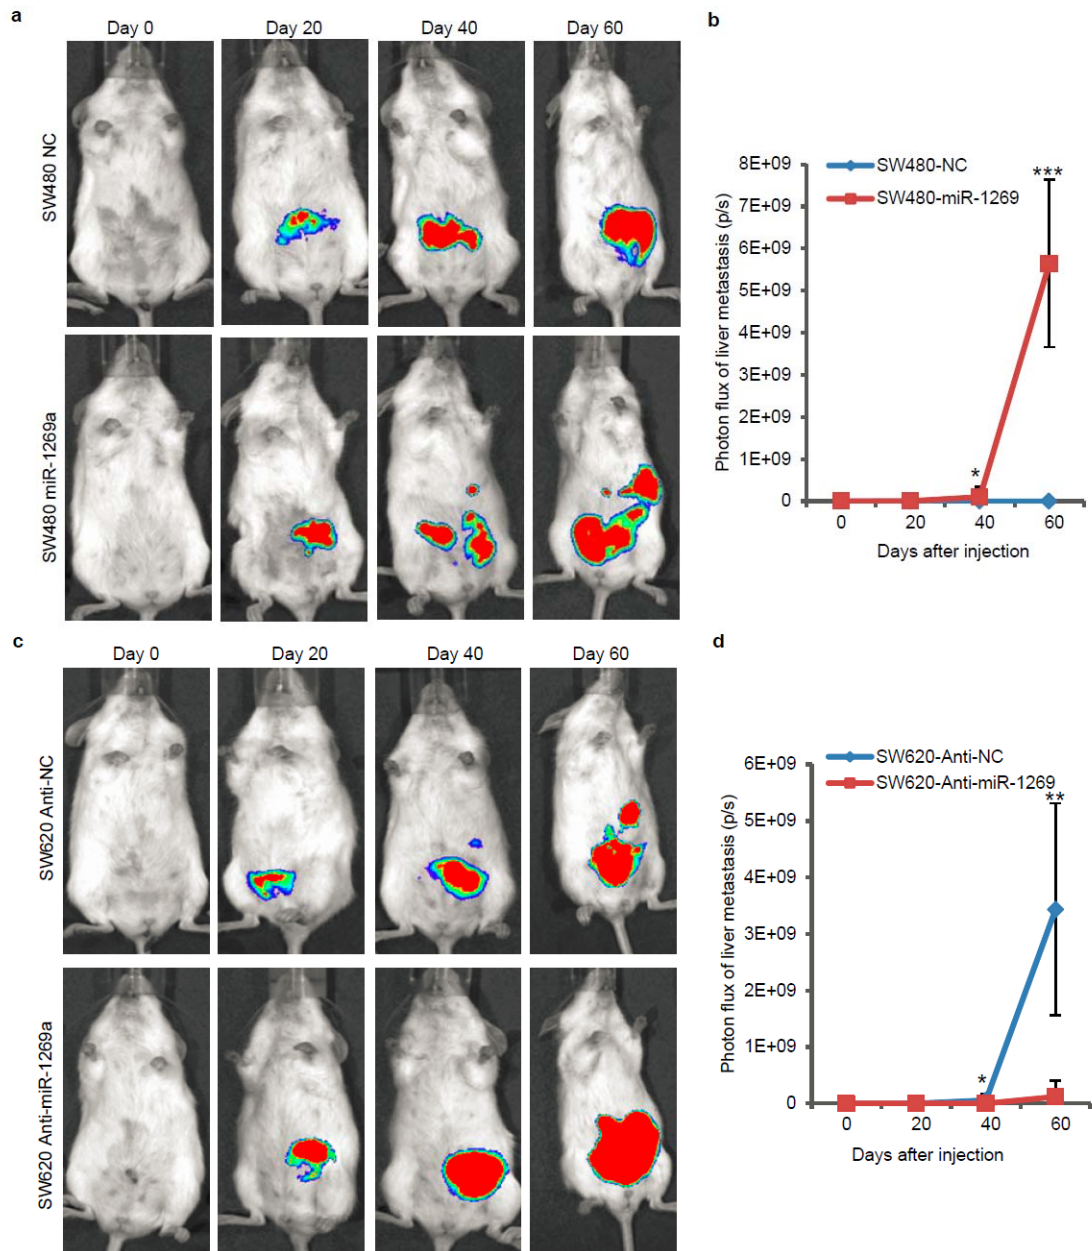

**Supplementary Figure 4. miR-1269a promoted hepatic metastasis.**

(a) Representative IVIS luciferase images taken from day 0 to day 60 post cecal implantation of SW480 cells. (b) Quantification of luciferase signals from hepatic metastases. (c) Representative IVIS luciferase images taken from day 0 to day 60 post cecal implantation of SW620 cells. (d) Quantification of luciferase signals from hepatic metastases. Error bars denote s.d. of 8 mice in each group. \*,  $p < 0.05$ ; \*\*,  $p < 0.01$ , \*\*\*,  $p < 0.001$ , Student's *t*-test.

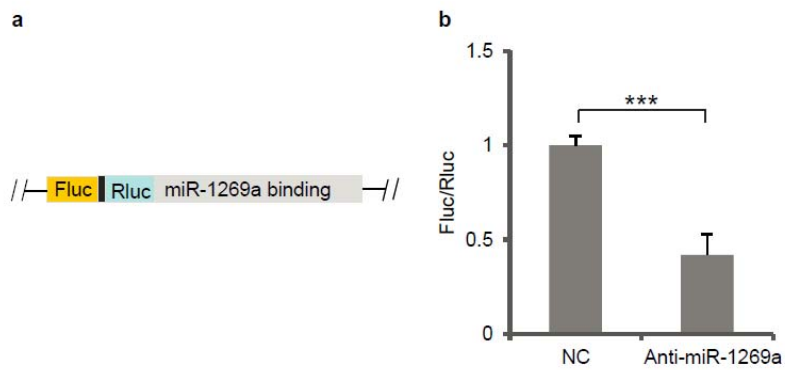

**Supplementary Figure 5. shRNA silencing of miR-1269a.**

(a) Schematic illustration of the reporter vector used in (b). miR-1269a binding sequences were cloned into the 3'UTR of Renilla luciferase (Rluc), with Firefly luciferase (Fluc) as a normalization control. Low miR-1269 expression leads to low Fluc/Rluc. (b) Luciferase reporter assay showing the knockdown efficiency of an anti-miR-1269a construct in SW620 cells. Error bars denote s.d. of triplicates. \*\*\*,  $p < 0.001$ , Student's *t*-test.

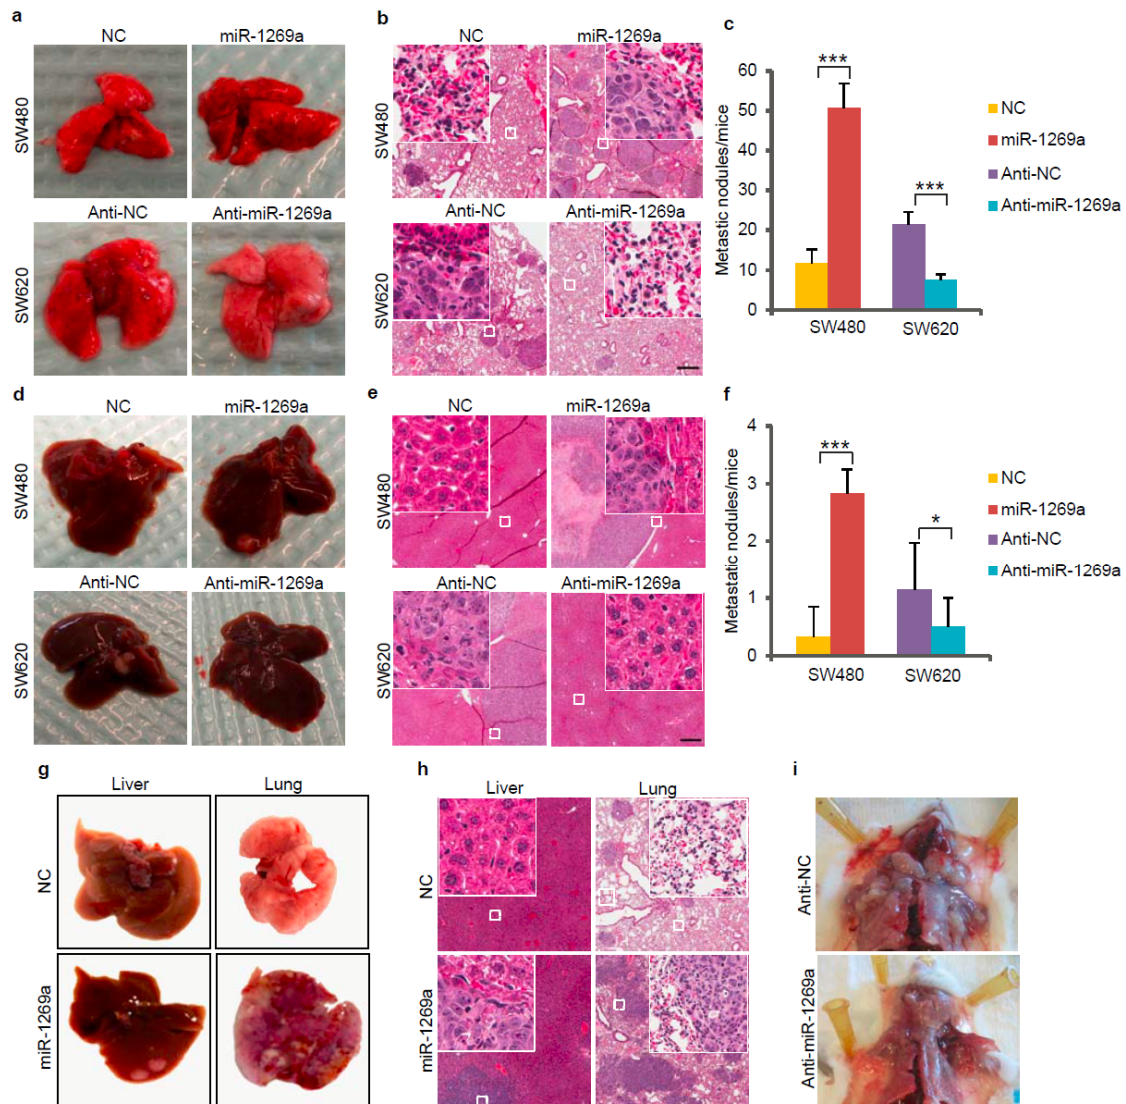

**Supplementary Figure 6. miR-1269a promotes CRC cell colonization of liver and lung after intravenous injection.**

(a-c) Representative images (a), H&E staining (b), and number of metastatic nodules (c) of lung metastasis. Ectopic miR-1269 expression promoted lung metastasis of SW480 cells (upper panel). Knockdown of endogenous miR-1269 by antisense RNA suppressed lung metastasis of SW620 cells (lower panel). (d-f) Representative images (d), H&E staining (e), and number of metastatic nodules (f) of liver metastasis. Ectopic miR-1269 expression promoted liver metastasis of SW480 cells (upper panel). Knockdown of endogenous miR-1269 by antisense RNA suppressed liver metastasis of SW620 cells (lower panel). (g-h) Representative images (g), H&E staining of liver and lung metastasis. Ectopic miR-1269 expression in HCT116 cells enhanced their liver and lung metastasis. (i) Representative images showing miR-1269 knockdown in LS174T cells reduced lymph node metastasis. In the H&E staining, inserts highlight big magnification of the indicated regions. Error bars denote s.d. of triplicates. \*,  $p < 0.05$ ; \*\*\*,  $p < 0.001$ , Student's *t*-test.

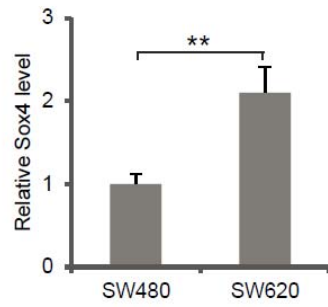

**Supplementary Figure 7. Sox4 expression in SW480 and SW620 cells.**

Sox4 expression levels in SW620 and SW480 cells, measured by RT-qPCR. Error bars denote s.d. of triplicates. \*\*,  $p < 0.01$ , Student's *t*-test.

**a**

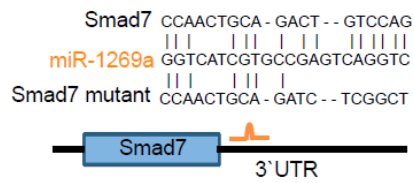

**b**

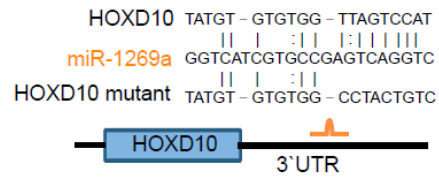

**Supplementary Figure 8. Schematic representation of miR-1269a binding sites in the Smad7 and HOXD10 3'UTR.**

(a) The predicted duplex formations between Smad7 3' UTR and miR-1269a, and mutation introduced to the seed region. (b) The predicted duplex formations between HOXD10 3' UTR and miR-1269a, and mutation introduced to the seed region.



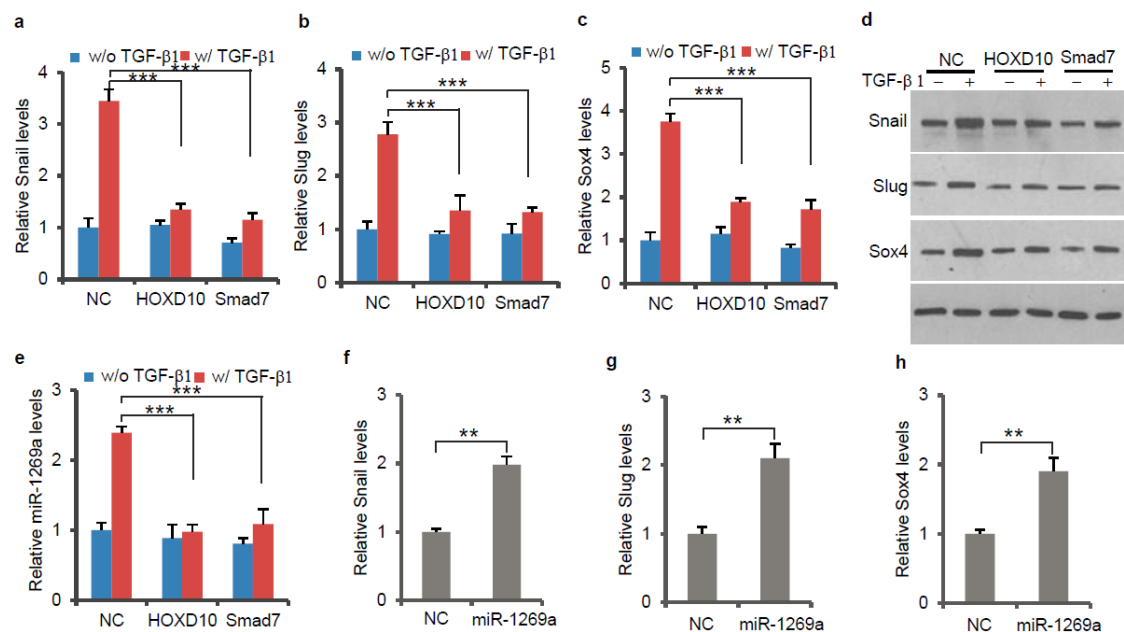

**Supplementary Figure 9. miR-1269a upregulates TGF-β1 signaling by targeting Smad7 and HOXD10.**

(a-d) RT-qPCR (a-c) and Western blot (d) showing ectopic expression of HOXD10 or Smad7 reduced TGF-β1 induction of Snail (a), Slug (b) and Sox4 (c) expression HT29 cells. (e) RT-qPCR showing ectopic expression of HOXD10 or Smad7 reduced TGF-β1 induction of miR-1269a in HT-29 cells. (f-h) RT-qPCR showing ectopic expression of miR-1269a upregulated Snail (f), Slug (g), and Sox4 (h) in HT29 cells. Error bars denote the s.d. of triplicates. \*\*,  $p < 0.01$ ; \*\*\*,  $p < 0.001$ , Student's *t*-test.

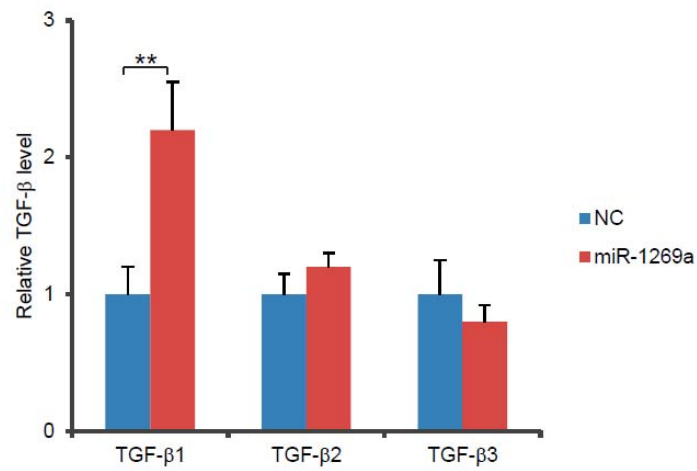

**Supplementary Figure 10. The effect of miR-1269a on TGF-β expression.**

RT-qPCR showing that ectopic expression of miR-1269a increased TGF-β1 expression with little effect on TGF-β2 and TGF-β3 expression. Error bars denote the s.d. of triplicates. \*\*,  $p < 0.01$ , Student's *t*-test.

Fig.3

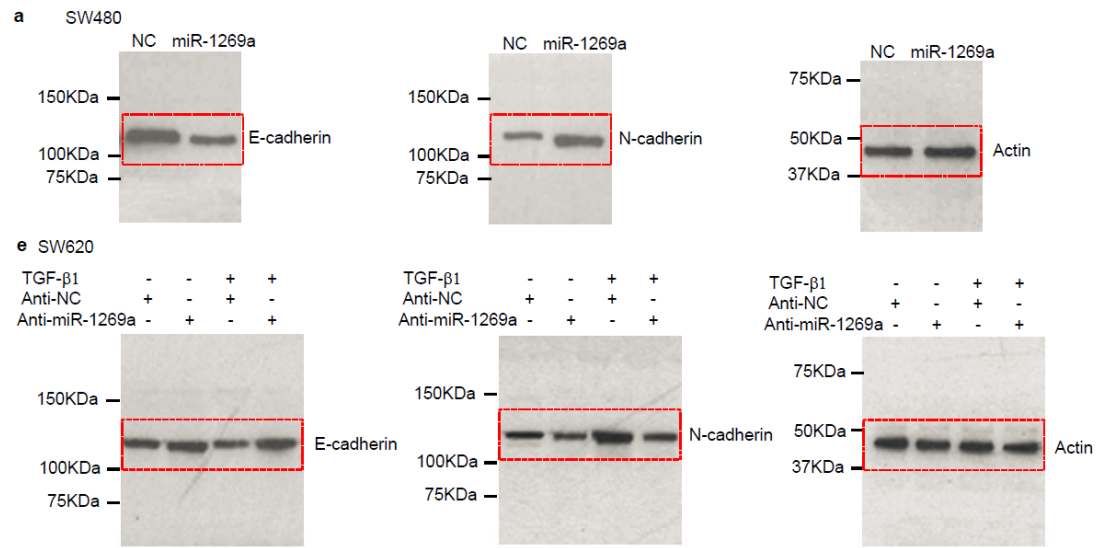

Fig.5

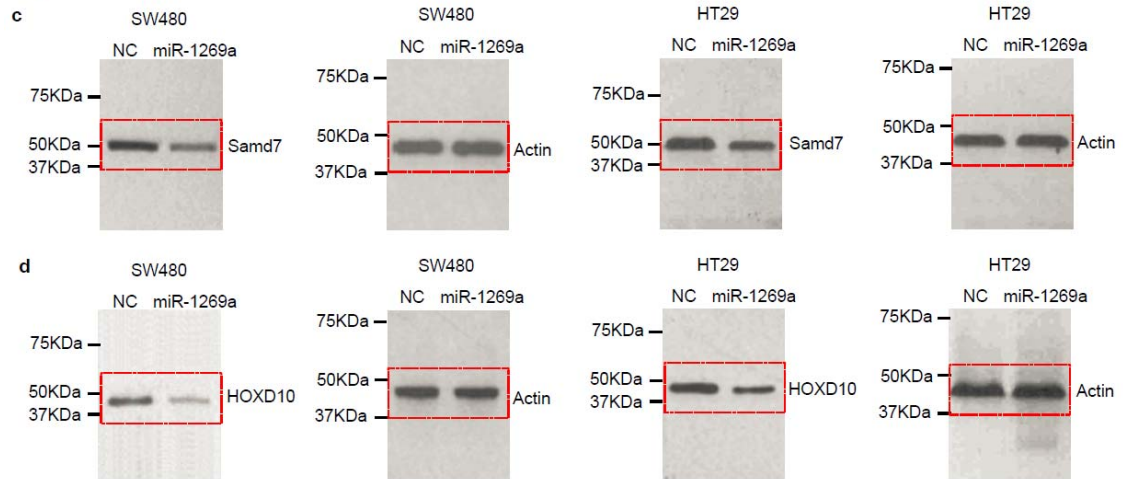

Supplementary Figure 11. Full scans of Western blots in Fig.3 and Fig.5.

Fig.6

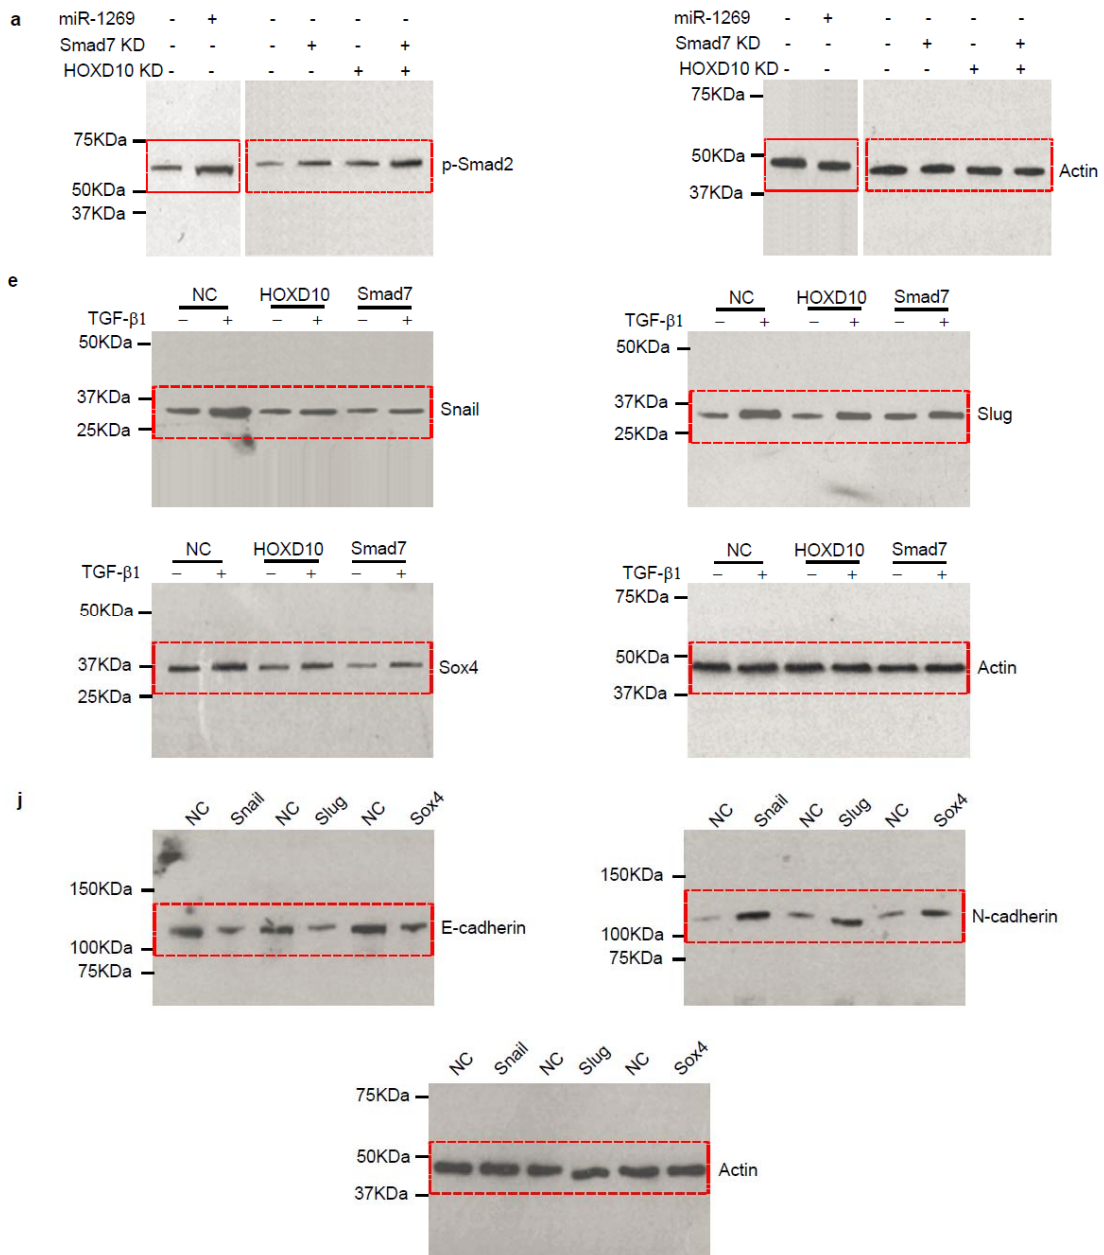

Supplementary Figure 12. Full scans of Western blots in Fig.6

**Supplementary Table 1. Top 16 microRNAs upregulated in stage IV CRCs vs. stage I/II CRCs**

| <b>Rank</b> | <b>MicroRNA</b> | <b>Means of read counts</b> | <b>Fold change</b> | <b>p value</b> |
|-------------|-----------------|-----------------------------|--------------------|----------------|
| 1           | hsa-mir-1269    | 240.56                      | 2.74               | 1.12E-02       |
| 2           | hsa-mir-105-1   | 15.60                       | 2.69               | 2.89E-02       |
| 3           | hsa-mir-105-2   | 16.10                       | 2.63               | 3.53E-02       |
| 4           | hsa-mir-34c     | 10.23                       | 1.75               | 2.13E-05       |
| 5           | hsa-mir-149     | 33.99                       | 1.65               | 2.83E-06       |
| 6           | hsa-mir-31      | 67.06                       | 1.51               | 4.88E-02       |
| 7           | hsa-mir-337     | 72.28                       | 1.27               | 1.25E-02       |
| 8           | hsa-mir-9-1     | 530.79                      | 1.25               | 3.34E-02       |
| 9           | hsa-mir-9-2     | 529.92                      | 1.23               | 3.68E-02       |
| 10          | hsa-mir-495     | 17.81                       | 1.20               | 2.29E-02       |
| 11          | hsa-mir-654     | 77.74                       | 1.19               | 4.56E-02       |
| 12          | hsa-mir-154     | 19.61                       | 1.18               | 1.76E-02       |
| 13          | hsa-mir-136     | 105.70                      | 1.16               | 5.30E-03       |
| 14          | hsa-mir-708     | 165.49                      | 1.14               | 3.98E-02       |
| 15          | hsa-mir-323     | 11.29                       | 1.11               | 1.25E-03       |
| 16          | hsa-mir-431     | 29.40                       | 1.10               | 2.67E-02       |

**Supplementary Table 2. Information of patients who provided tissues samples for comparing miR-1269a expression levels in early- vs. late-stage CRC tumors.**

| Patient | Gender | Age at visit | Stage | Differentiation | Lymph nodes |
|---------|--------|--------------|-------|-----------------|-------------|
| P1      | M      | 52.56        | I     | Well            | N0          |
| P2      | M      | 70           | I     | Poor            | N0          |
| P3      | M      | 54           | I     | Moderate        | N0          |
| P4      | F      | 84           | I     | Moderate        | N0          |
| P5      | F      | 65           | I     | Moderate        | N0          |
| P6      | M      | 43           | IIA   | NA              | N0          |
| P7      | F      | 59           | IIB   | Poor            | N0          |
| P8      | M      | 87           | IIB   | NA              | N0          |
| P9      | F      | 62           | IIB   | Well            | N0          |
| P10     | F      | 44           | I     | Moderate        | N0          |
| P11     | M      | 85           | I     | NA              | N0          |
| P12     | F      | 81           | IIA   | Moderate        | N0          |
| P13     | F      | 74           | IIIA  | Poor            | N1          |
| P14     | M      | 73           | IIIA  | Well            | N1          |
| P15     | F      | 55           | IIIA  | NA              | N1          |
| P16     | M      | 77           | IIIC  | Poor            | N2          |
| P17     | F      | 68           | IV    | Poor            | N2          |
| P18     | M      | 56           | IV    | Poor            | N2          |
| P19     | F      | 21           | IV    | Moderate        | N1          |
| P20     | F      | 46           | IV    | NA              | N1          |
| P21     | F      | 73           | IV    | Moderate        | N1          |
| P22     | M      | 66           | IV    | Poor            | N1          |
| P23     | M      | 88           | IV    | Poor            | N2          |
| P24     | F      | 73           | IV    | Poor            | N1          |
| P25     | F      | 71           | IIIC  | NA              | N2          |
| P26     | F      | 50           | IIIC  | Poor            | N2          |
| P27     | F      | 39           | IIIA  | NA              | N1          |
| P28     | M      | 37           | IV    | Poor            | N2          |
| P29     | F      | 74           | IIIC  | Poor            | N1          |

**Supplementary Table 3. Computationally predicted miR-1269a target genes.**

| Refseq    | Symbol | Description                                                                                         |
|-----------|--------|-----------------------------------------------------------------------------------------------------|
| NM_000020 | ACVRL1 | activin A receptor type II-like 1                                                                   |
| NM_000033 | ABCD1  | ATP-binding cassette, sub-family D (ALD), member 1                                                  |
| NM_000046 | ARSB   | arylsulfatase B                                                                                     |
| NM_000073 | CD3G   | CD3g molecule, gamma (CD3-TCR complex)                                                              |
| NM_000080 | CHRNE  | cholinergic receptor, nicotinic, epsilon                                                            |
| NM_000084 | CLCN5  | chloride channel 5 (nephrolithiasis 2, X-linked, Dent disease)                                      |
| NM_000125 | ESR1   | estrogen receptor 1                                                                                 |
| NM_000138 | FBN1   | fibrillin 1                                                                                         |
| NM_000020 | ACVRL1 | activin A receptor type II-like 1                                                                   |
| NM_000033 | ABCD1  | ATP-binding cassette, sub-family D (ALD), member 1                                                  |
| NM_000046 | ARSB   | arylsulfatase B                                                                                     |
| NM_000073 | CD3G   | CD3g molecule, gamma (CD3-TCR complex)                                                              |
| NM_000080 | CHRNE  | cholinergic receptor, nicotinic, epsilon                                                            |
| NM_000084 | CLCN5  | chloride channel 5 (nephrolithiasis 2, X-linked, Dent disease)                                      |
| NM_000125 | ESR1   | estrogen receptor 1                                                                                 |
| NM_000208 | INSR   | insulin receptor                                                                                    |
| NM_000212 | ITGB3  | integrin, beta 3 (platelet glycoprotein IIIa, antigen CD61)                                         |
| NM_000217 | KCNA1  | potassium voltage-gated channel, shaker-related subfamily, member 1 (episodic ataxia with myokymia) |
| NM_002148 | HOXD10 | homeobox D10                                                                                        |
| NM_005904 | SMAD7  | SMAD family member 7                                                                                |
